1 Three-dimensional motion perception: comparing speed and speed change discrimination for  
2 looming stimuli

3 Abigail R. I. Lee\*<sup>1,2</sup>, Justin M. Ales<sup>2</sup>, Julie M. Harris<sup>2</sup>

4 1. Centre for Vision Research, York University, Toronto, Ontario, Canada

5 2. School of Psychology and Neuroscience, University of St Andrews, St Andrews, Fife,  
6 United Kingdom

7 aril@yorku.ca

8

9 ORCID IDs:

10 Lee: [orcid.org/0000-0002-5052-1029](https://orcid.org/0000-0002-5052-1029)

11 Ales: [orcid.org/0000-0002-2089-1563](https://orcid.org/0000-0002-2089-1563)

12 Harris: [orcid.org/0000-0002-3497-4503](https://orcid.org/0000-0002-3497-4503)

13

## Abstract

14 Judging the speed of objects moving in three dimensions is important in our everyday lives,  
15 because we interact with objects in a three-dimensional world. However, speed perception  
16 has been seldom studied for motion in depth, particularly when using monocular cues such as  
17 looming. Here, we compared speed discrimination, and speed change discrimination, for  
18 looming stimuli, to better understand what visual information is used for these tasks. For the  
19 speed discrimination task, we manipulated the distance and duration information available, to  
20 investigate if participants were specifically using speed information. For speed change  
21 discrimination, total distance and duration were held constant, hence they could not be used  
22 to successfully perform that task. We found speed change discrimination thresholds were  
23 consistently higher than those for speed discrimination. Evidence suggested that participants  
24 used a variety of cues to complete the speed discrimination task, not always solely relying on  
25 speed. Further, our data suggested that participants may switch between cues on a trial to trial  
26 basis. We conclude that speed change discrimination for looming is more difficult than speed  
27 discrimination, and that naïve participants may not always exclusively use speed for speed  
28 discrimination.

29 Key words: Looming, Motion in depth, Speed discrimination, Speed change discrimination

30

## Introduction

31 Perceiving the speed of objects moving towards us in the world is important in our daily  
32 lives, for example when safely crossing a road. Of particular importance is the ability to  
33 judge the speed, and speed changes, of objects approaching in three dimensions. There are  
34 both monocular and binocular sources of visual information we can use to judge these  
35 movements. Speed discrimination using binocular cues to motion in depth has been well  
36 studied (Brooks, 2002; Brooks & Mather, 2000; Brooks & Stone, 2004, 2006; Harris &  
37 Watamaniuk, 1995, 1996; Wardle & Alais, 2013). Perhaps more overlooked recently is the  
38 contribution of monocular cues to motion in depth, such as looming. Looming is usually  
39 defined as the change in retinal size that occurs when an object moves towards or away from  
40 an observer (e.g. Sekuler, 1992). The first evidence for the existence of mechanisms  
41 specifically sensitive to such change in size, that could be used for the perception of motion-  
42 in-depth, came from motion adaptation studies demonstrating that adaptation to size-change  
43 was separable to that for lateral motion (Beverley & Regan, 1979; Regan & Beverley, 1978).

44

45 In this study we investigate speed and speed change discrimination for looming stimuli, and  
46 we explore the strategies that naïve participants may be using for speed discrimination. We  
47 define looming as the expansion of the image of an object on the retina as it approaches,  
48 while the object in the world remains a constant size. When an object approaches or moves  
49 away from an observer at a constant speed in the world, the image of that object on the retina  
50 accelerates or decelerates respectively. The closer the object gets to the eye, the greater the  
51 acceleration. Therefore, to emulate real-world motion, our looming stimuli moved at a  
52 constant world speed, which resulted in an accelerating retinal speed (see Lee, Ales, &  
53 Harris, 2019).

54

55 Looming is thought to play a role in judging the speed of objects moving towards us. Speed  
56 discrimination for looming can be as sensitive as that for 2D motion, and is superior to that  
57 using other 3D motion cues. Speed discrimination thresholds for looming stimuli can be as  
58 low as 5% (Sekuler, 1992) similar to those for 2D motion (de Bruyn & Orban, 1988;  
59 Heidenreich & Turano, 1996; McKee, 1981; McKee, Silverman, & Nakayama, 1986; McKee  
60 & Welch, 1985; Orban, de Wolf, & Maes, 1984; Snowden & Braddick, 1991). By  
61 comparison, speed discrimination thresholds when using binocular cues to motion in depth  
62 are often much higher than that reported for looming and for 2D motion stimuli (Brooks &  
63 Stone, 2004, 2006, Harris & Watamaniuk, 1995, 1996). The higher sensitivity for looming  
64 cues over binocular cues suggests that looming is a critical cue for 3D motion perception.

65

66 However, speed discrimination tasks can be problematic to interpret. In traditional speed  
67 discrimination designs, it is impossible to be certain that participants judge speed, rather than  
68 distance or duration. Typically, if distance is kept constant, a participant could use speed or  
69 duration to make judgements. Conversely, if duration is held constant, participants can use  
70 speed or distance to make their judgements (for a review see McKee & Watamaniuk, 1994).  
71 To avoid this problem, speed change discrimination tasks have been developed (Monen &  
72 Brenner, 1994; Snowden & Braddick, 1991). In these tasks, observers are asked to  
73 discriminate a change in speed occurring during one interval, allowing total duration and  
74 distance to be held constant. In the standard interval, a stimulus travels at a constant speed. In  
75 the test interval, the stimulus travels slower and then an equal amount faster than the standard  
76 interval speed. Thus, the mean speed, and therefore the duration and distance, are kept  
77 constant whilst speed is varied. There is evidence from studies that explore 2D motion, and

78 several types of 3D motion, that speed change discrimination is much more difficult than  
79 speed discrimination (e.g. Lee et al., 2019; Monen & Brenner, 1994; Snowden & Braddick,  
80 1991).

81

82 No study has previously explored whether speed change discrimination for the monocular 3D  
83 motion cue of looming is more difficult than speed discrimination, and if so, why this may  
84 be. However, it is possible that speed discrimination may be an easier task because  
85 participants are able to use additional distance or duration cues to give their responses. We  
86 therefore had two aims:

87 (1) To determine if speed change discrimination for looming is a more difficult task than  
88 speed discrimination.

89 (2) To determine if participants use distance or duration information, rather than speed  
90 information, when it is available in speed discrimination tasks, and if this could  
91 explain the apparent difficulty of speed change discrimination judgements where  
92 these cues cannot be used.

93

94

## Methods

### 95 **Participants**

96 Participants were required to have normal or corrected-to-normal vision and a stereoacuity of  
97 at least 120 arcseconds, as measured by the TNO test (16th edition). For the speed change  
98 discrimination task, 15 participants were recruited. Two participants had a stereoacuity of  
99 over 120 arcseconds, 1 participant was unable to do the task, and 1 participant stopped  
100 attending the testing sessions, leaving 11 participants who completed the experiment (8  
101 female, 3 male, aged between 18-34). For the speed discrimination tasks, 9 new naive  
102 participants were recruited, as the participants from the speed change discrimination task  
103 could not be recalled in line with our ethical approval requirements. One participant from this  
104 new group had a stereoacuity of over 120 arcseconds, whilst another participant did not pass  
105 the training, leaving 7 participants who completed the experiment (5 female, 2 male, aged  
106 between 18-28). Participants gave informed consent before beginning the experiment and all  
107 procedures were approved by the University of St Andrews University Teaching and  
108 Research Ethics Committee (UTREC; Approval code: PS11904). All experiments adhered to  
109 the tenets of the Declaration of Helsinki.

110

## 111 **Materials**

112 Stimuli were presented on an Iiyama MM904UTA Vision Master Pro 455 cathode ray tube  
113 screen with a refresh rate of 85Hz and a resolution of 1280x1024 using a MacPro. A  
114 Cambridge Research Systems ColorCal MK II colorimeter was used to calibrate screen  
115 luminance, and an accurate pixel per centimetre conversion was obtained by measuring lines  
116 on the screen by hand. The screen was viewed through a four-mirror stereoscope (because the  
117 set-up was also used for concurrent binocular vision experiments). However, here, the right  
118 and left eyes views were always identical (zero binocular disparity). Including the distances  
119 between the stereoscope mirrors, the screen was viewed from a distance of 97cm.

120

## 121 **Experiment Design**

### 122 *Stimulus Design*

123 All stimuli were viewed from a distance of 97cm created using MATLAB R2014b (The  
124 MathWorks Inc, Natick, MA, USA) and Psychtoolbox 3 (Brainard, 1997; Kleiner, Brainard,  
125 & Pelli, 2007; Pelli, 1997). Stimuli were presented on a grey background with a luminance of  
126 29.9 cd/m<sup>2</sup>. The stimulus used in the main experimental conditions consisted of a pair of  
127 white horizontal lines that were 6.96 degrees long and had a luminance of 59.9cd/m<sup>2</sup> (see  
128 Figure 1). The horizontal lines in the stimulus expanded away from one another to deliver the  
129 looming cue. Sekuler (1992) suggests that looming is encoded by the pooling of  
130 unidirectional motion signals. Each of the two horizontal lines in the stimulus can be  
131 considered an independent set of pooled unidirectional motion signals. The two lines have  
132 opposing motion directions, generating a looming signal. Horizontal lines were used as they  
133 create no horizontal disparity, so that there would be no conflict between the looming cues

134 and the lack of changing binocular disparity. The pair of lines simulates a very wide object  
135 approaching the observer (whose left and right edges are outside the field of view). Each line  
136 remained a constant 0.95 arcmin wide on the screen. The separation between the lines varied  
137 over time to simulate motion towards the observer, but at the plane of fixation (the screen  
138 distance of 97cm) the separation between the two lines was 2cm. The starting separation of  
139 the two lines was therefore 2cm for the speed discrimination conditions where line movement  
140 began at the plane of fixation, and 1.66 cm for the speed change discrimination condition  
141 where line movement began from 20cm behind the plane of fixation.

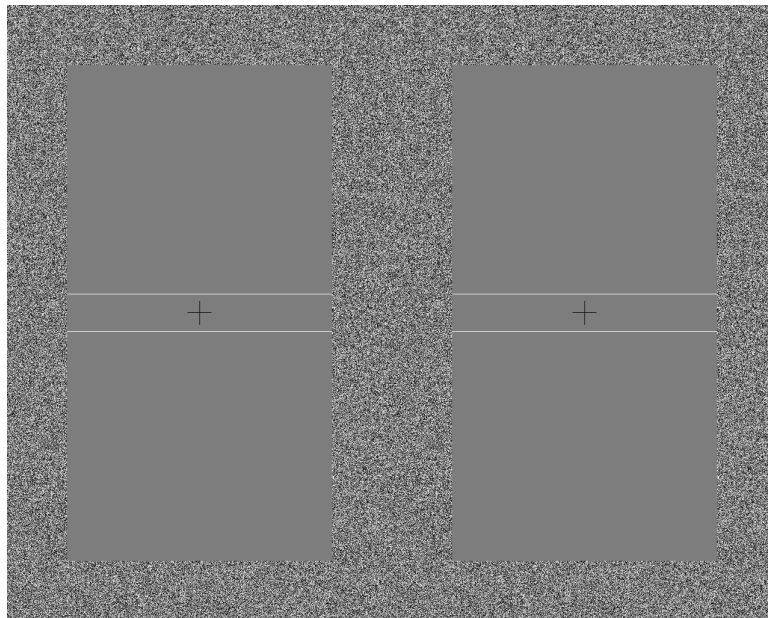

**Figure 1.** The looming stimulus used for all experimental conditions. The bottom lines moved downwards and the top lines moved upwards to simulate looming motion towards the observer. The left and right halves of the screen were delivered to each eye separately via a 4-mirror stereoscope to deliver a fused percept, but there was no binocular disparity displayed in the stimulus.

142



143 Stimuli were presented with a central black fixation cross with a luminance of 0.09 cd/m<sup>2</sup>.  
144 This was 37.9 long by 37.9 arcmin wide. To indicate when a response was required, a black  
145 56.9 by 56.9 arcmin box of the same luminance appeared around the fixation cross. The  
146 fixation cross and box had line widths of 0.95 arcmin. Throughout each trial, an aperture  
147 frame of approximately uniformly distributed luminance noise, with individual pixels  
148 randomly assigned grey levels, was displayed around all stimuli. The aperture frame was 1.58  
149 degrees wide, had a minimum luminance of 0.09 cd/m<sup>2</sup> and a maximum luminance of 59.9  
150 cd/m<sup>2</sup>. The half-screen visible through the stereoscope used was 10.1 degrees wide and 16.2  
151 degrees tall. Within the aperture frame a rectangle 6.96 degrees wide and 13.0 degrees tall  
152 was used for stimulus presentation.

153

#### 154 *Main Experiment Conditions*

155 The stimulus used contained constant world speed (accelerating retinal speed) for three main  
156 experimental conditions:

- 157 (I) *Speed change discrimination* containing no useful distance or duration  
158 information. The task was to judge which interval contained a speed change.
- 159 (II) *Duration (speed discrimination)*, containing duration and speed information. The  
160 task was to discriminate which interval contained faster motion.
- 161 (III) *Distance (speed discrimination)* containing distance and speed information. The  
162 task was to again discriminate which interval contained faster motion.

163

#### 164 *Determining which cue is used for speed discrimination with catch trials*

165 For each of the two speed discrimination conditions (*Distance* and *Duration*), we included a  
166 total of 30 ‘catch trials’ designed to reveal what cues participants were using to perform the  
167 task. These trials contained standard and catch *intervals*. The catch intervals contained the  
168 same speed as the standard interval but had increased distance and duration (something  
169 travelling for longer at the same speed travels further). The duration of the catch interval was  
170 always 1.070s, and the standard interval duration was the same as for the main experimental  
171 trials in that block (0.717s for *Duration* and 0.506 for *Distance*). This difference results in  
172 catch intervals that should be easily discriminable if the participants are using the distance  
173 and/or duration cues.

174

175 We coded a participant’s response as “correct” if they chose the catch interval and  
176 “incorrect” if they chose the standard. Because the catch trials contained the same speed in  
177 both intervals, if participants used speed only we would expect performance to be at 50%.  
178 However, the catch intervals contained increased distance travelled and duration compared to  
179 the standard. Increased distance travelled might be associated with an object appearing to  
180 travel faster. If so, participants should choose the catch interval more often. An increased  
181 duration might be associated with an object appearing to travel slower. If using duration,  
182 participants would choose the standard interval more often. No matter what rule the  
183 participant used, if either distance or duration was used in addition to, or instead of speed to  
184 perform the task, we would expect performance to be different from 50% for these catch  
185 trials.

186

187 We made a simple assumption: that participants would use only one cue (duration, distance  
188 or speed), and they would attempt to use the same cue across all trials. Here, we had a null

189 hypothesis that if people are using solely speed information, they would be picking the catch  
190 trial 50% of the time, because the catch and the standard intervals contain the same speed.  
191 We can use the binomial test to determine if we can reject the null hypothesis. To do this we  
192 use the binomial distribution to find which values were outside of the 95% confidence  
193 interval for the null hypothesis. Values outside of the confidence intervals indicate that we  
194 reject the null hypothesis, and suggest that participants were using a cue other than speed to  
195 complete the task. For our 30 catch trials per condition, the 95% binomial proportion  
196 confidence interval for 50% performance is between 30% and 70%. Thus, if people picked  
197 the catch 21 or more times (70% of occasions or more), we can reject the null hypothesis and  
198 infer that participants were not only using speed. If the catch interval was picked 9 or less  
199 times (30% of occasions or less), participants were again not only using speed.

200

201 As the distance and duration were greater in the catch interval, we could infer which cue  
202 participants were using to complete the speed discrimination task. We can do this if we  
203 assume participants are using a rule that is consistent with speed judgments.

204 *Speed:* If participants used only speed, not duration or distance, to make their judgement, they  
205 would pick the catch interval on 50% of occasions (as we used a forced-choice task and the  
206 speeds in each interval were identical). In this scenario we would accept the null hypothesis  
207 and performance would be consistent with participants using only speed information.

208 *Distance:* If participants used the distance cue to make their judgement, they would pick the  
209 catch interval significantly more than 50% of the time (because the distance travelled in the  
210 catch interval was further, and something that travels further may be thought of as travelling  
211 faster). In this scenario we would reject the null hypothesis that the participant is using only  
212 speed information.

213 *Duration:* If participants used the duration cue to make their judgement, they would pick the  
214 catch interval significantly less than 50% of the time (because the standard interval had the  
215 shorter duration, and something that travels the same distance in a shorter duration may be  
216 thought of as travelling faster). Again in this scenario we would reject the null hypothesis that  
217 the participant is using only speed information.

218

### 219 *Training*

220 Two further stimuli were used only for training purposes before the main experiment began:  
221 Training I: a square drifting grating with a spatial frequency of 1 cycle per degree which  
222 moved from left to right at a constant retinal speed. The grating was 4 degrees tall and 4  
223 degrees wide. Training II: a pair of white vertical lines with a luminance of 59.9 cd/m<sup>2</sup> that  
224 moved from left to right at a constant retinal speed. These lines were each 13.0 degrees tall  
225 and 0.95 arcmin wide. All the code used in this experiment is available online at  
226 <https://osf.io/xvs5n/>.

227

## 228 **Procedure**

### 229 *Speed Change Discrimination*

230 For the speed change discrimination condition, participants completed a 2-interval forced  
231 choice task, with a 7-level method of constant stimuli design. One interval contained an  
232 instantaneous speed change from a slower to a faster speed, the other contained motion at a  
233 constant speed. Participants were asked to identify the interval that contained the speed  
234 change. Each interval began with the stimulus appearing and remaining stationary for 250ms,  
235 before moving for 1 second. If the interval contained a change in speed, it occurred after

236 500ms of motion. There was a gap of 1s between the two intervals. Before the first interval  
237 participants heard one beep; before the second they heard two beeps. A run consisted of 210  
238 trials divided into three blocks, each with 10 trials per level, giving 70 trials per block. These  
239 blocks were presented in a random order amongst those for a different study, with other  
240 speed change blocks containing either binocular or binocular and looming cues to motion in  
241 depth.

242

243 A standard speed of 40 cm/s towards the observer was used, which translated to a speed  
244 range of 20.1- 46.3 arcmin/s on the retina over the full interval. In each successive level of  
245 the condition, the speed before the speed change decreased by 5 cm/s, and the speed after the  
246 change increased by 5 cm/s in the world. This meant that the test speeds were (speed before  
247 change-speed after change): 40cm/s-40cm/s, 35cm/s-45cm/s, 30cm/s-50cm/s, 25cm/s-  
248 55cm/s, 20cm/s-60cm/s, 15cm/s-65cm/s, and 10cm/s-70cm/s. In the maximum speed change  
249 level, from 10cm/s-70cm/s, this translates into a range of retinal speeds between 5.02-5.48  
250 arcmin/s for the period before the instantaneous speed change, and a range of retinal speeds  
251 between 38.4-80.9 arcmin/s after the change.

252

253 All participants were required to complete three training blocks prior to the main experiment,  
254 which used the same task, but different stimuli. The Training I stimulus, a drifting grating,  
255 was used first in a speed change discrimination task like that used in the main experiment,  
256 and participants received audio feedback on their responses. The second block was identical,  
257 except participants no longer received feedback. The third block used the Training II stimulus  
258 (two vertical lines) in a speed change discrimination task with no feedback. Stimuli in these 3  
259 training blocks all used constant retinal speed and contained the same two speed change

260 levels. Participants compared a standard stimulus moving at 283.4 arcmin/s to a step speed  
261 change from 212.6 to 354.1 arcmin/s, or from 70.9 to 495.3 arcmin/s. The purpose of the  
262 training blocks was to introduce participants to the task by first using a commonly-used  
263 motion stimulus undergoing lateral motion (Training I), then a stimulus more similar to that  
264 used in the main experiment (Training II).

265

### 266 *Speed Discrimination with Duration or Distance*

267 For the speed discrimination conditions containing either duration or distance cues (*Duration*  
268 and *Distance*), participants viewed two temporal intervals both containing stimuli travelling  
269 at a constant world speed. The task was to pick the interval in which the stimulus moved  
270 faster. Participants were told to judge the speed, but were not given any instructions about use  
271 of distance or duration information. For each condition two consistent cues were available  
272 (either speed and duration, or speed and distance). Our aim was to test whether performance  
273 was better for one condition or the other and compare these speed discrimination conditions  
274 to the *Speed Change* condition (where only speed could be used). A 7-level method of  
275 constant stimuli design was used. Each interval began with the stimulus appearing and  
276 remaining stationary for 0.250s. The *Distance* condition, where duration was fixed but  
277 distance information was available, contained 0.506s of motion in both the standard and test  
278 intervals. The distances presented ranged between 20 cm in depth in the standard speed level  
279 and 35 cm in depth in the maximum speed level and 42.8 cm in the catch interval. The  
280 *Duration* condition, where distance was fixed but duration information was available,  
281 consisted of a test interval containing a range of durations to keep the distance travelled  
282 constant at 28.7cm towards the observer. The durations ranged between 0.412s of motion for  
283 the maximum speed level, and 0.717s of motion for the minimum speed level. The standard

284 interval in the *Duration* condition was presented for 0.717s. There was a gap of 1s between  
285 intervals, and before the first interval participants heard one beep; before the second they  
286 heard two beeps. The duration of the catch interval was always 1.070s, and the standard  
287 interval duration was the same as for the main experimental trials in that block (0.717s for  
288 *Duration* and 0.506 for *Distance*). The *Duration* and *Distance* conditions each consisted of  
289 210 main experiment trials, which were randomly interleaved with the catch trials presented  
290 in 3 blocks with 10 trials per level, to provide participants with breaks. Blocks contained  
291 either only *Duration* or only *Distance* trials, but blocks of each condition were presented in a  
292 random order.

293

294 In both speed discrimination conditions, the standard stimulus had a speed of 40 cm/s in the  
295 world. Successive test levels increased in speed by 5 cm/s, to a maximum speed of 70 cm/s.  
296 This meant that test levels had speeds of: 40cm/s, 45cm/s, 50cm/s, 55cm/s, 60cm/s, 65cm/s  
297 and 70cm/s. We chose these speeds so that they would be matched to the second speeds used  
298 in the test intervals of the speed change discrimination condition (see above). In the *Distance*  
299 conditions, these translated into retinal speeds of 29.2 – 46.3 arcmin/s in the standard level,  
300 and 51.2-125.0 arcmin/s in the maximum speed level. In the *Duration* conditions, these world  
301 speeds translated into retinal speeds of 29.2-58.8 arcmin/s in the standard level, and 51.2-  
302 103.7 arcmin/s in the maximum speed level. In the catch trials, the speed of stimuli in the  
303 catch and standard intervals was 40 cm/s in the world, which translates differently into  
304 accelerating retinal speeds depending on the duration of the interval. In the *Duration*  
305 condition, the standard interval speeds ranged between 29.2 – 58.8 arcmin/s, and the catch  
306 interval speeds ranged between 29.2 – 93.4 arcmin/s. In the *Distance* condition, the speeds in  
307 the standard interval ranged between 29.2 – 46.6 arcmin/s, while the catch interval speeds  
308 ranged between 29.2 – 93.4 arcmin/s.

309

310 Prior to the experiment start, participants completed two speed discrimination training blocks,  
311 one *Duration* and one *Distance*, using the horizontal line stimulus used in the main  
312 experiment. Participants received audio feedback on their responses and two levels of speed  
313 difference were used. The standard stimulus moved towards the observer at 40 cm/s, whilst  
314 the test stimulus had a speed of 50 cm/s or 70 cm/s in the world.

315

### 316 **Analysis**

317 We measured 75% thresholds for speed change discrimination and speed discrimination by  
318 fitting cumulative normal psychometric functions using MATLAB R2014b (The MathWorks  
319 Inc, Natick, MA, USA) and the Palamedes toolbox (Prins & Kingdom, 2009). With this we  
320 found the speed change required to respond correctly on 75% of occasions, or the difference  
321 in speed required to respond correctly on 75% of occasions, both as a function of world speed  
322 (cm/s). This method was the most appropriate method of analysing the data from the speed  
323 change discrimination and speed discrimination tasks to avoid bias. We also considered  
324 analysing our data in terms of the proportion speed difference or speed change, as we have  
325 done previously (see Lee et al., 2019), and in terms of the arcmin/s difference or change in  
326 speed. However, these methods introduced bias to the results because the arcmin/s changes in  
327 speed were not identical between conditions, and consequently the proportion speed changes  
328 and differences that were based on these arcmin/s values were also not identical between  
329 conditions. Example psychometric functions are shown in Figure 2. All data, experimental  
330 code and analysis code is available online at <https://osf.io/xvs5n/>.

331



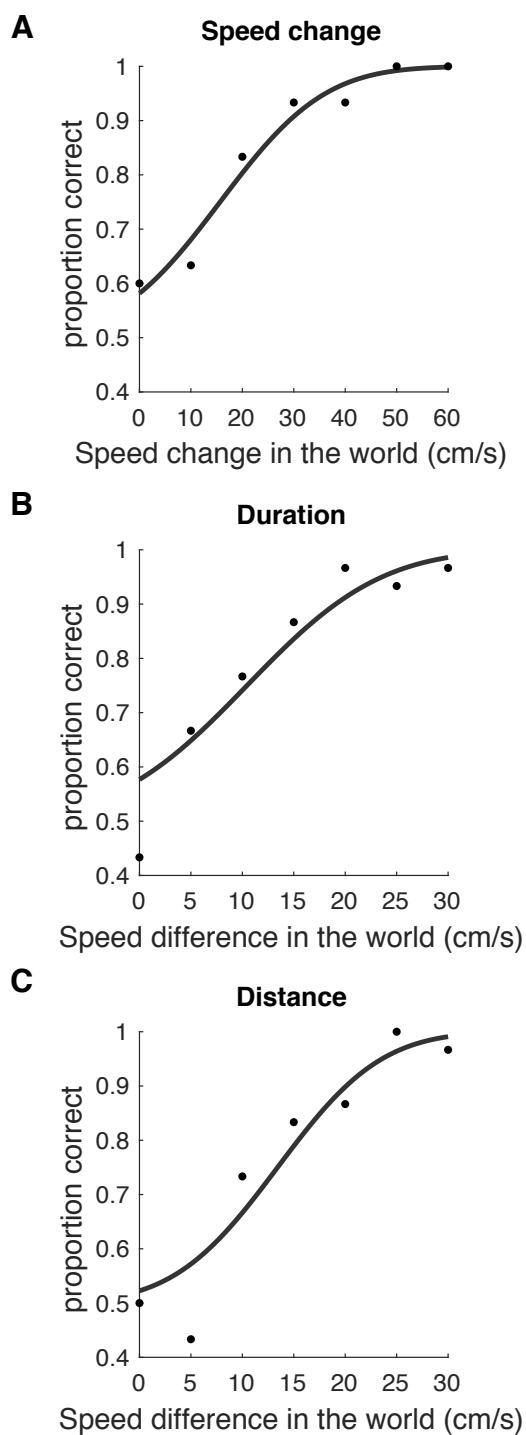

**Figure 2.** Example psychometric functions in the speed change discrimination condition (A), the *Duration* speed discrimination condition (B), and the *Distance* speed discrimination condition (C). (B) and (C) are data from the same participant.

333 JASP (Version 0.9.1; JASP Team, 2018) was used to conduct a pair of two-sample t-tests.  
334 Threshold values between the *Speed Change* discrimination condition and the *Duration* speed  
335 discrimination condition, and the *Speed Change* discrimination condition and the *Distance*  
336 speed discrimination condition were compared. This was done to determine if there was a  
337 difference in threshold between the speed change discrimination condition and the two speed  
338 discrimination conditions. A paired t-test was then used to compare thresholds between the  
339 *Distance* and *Duration* speed discrimination conditions, to investigate if thresholds varied  
340 depending on whether duration or distance information were available respectively. The  
341 significance level for all t-tests was taken as 0.0167 (Bonferroni correction for 3  
342 comparisons). We also measured Pearson's correlation coefficient between the catch trial  
343 results for each participant in each speed discrimination condition to observe whether  
344 individual participants consistently used the same cue to complete the catch trials in both the  
345 *Duration* and *Distance* conditions.

346

347

## Results

### 348 *Comparing speed discrimination and speed change discrimination*

349 Speed change discrimination was more difficult than speed discrimination when duration or  
350 distance information was available (Figure 3). *Speed change discrimination* thresholds were  
351 significantly higher than those for *speed discrimination* with a fixed distance and variable  
352 duration (*Duration* condition;  $t(16) = 4.180$ ,  $p < 0.001$ ) and also were higher than for *speed*  
353 *discrimination* with a fixed duration and variable distance (*Distance* condition;  $t(16) = 3.009$ ,  
354  $p = 0.008$ ). There was no significant difference in thresholds between the *Duration* and  
355 *Distance* conditions ( $t(6) = -0.381$ ,  $p = 0.716$ ). It appears that speed change discrimination is  
356 a more difficult task than speed discrimination irrespective of the cues available to  
357 distinguish between the speeds.

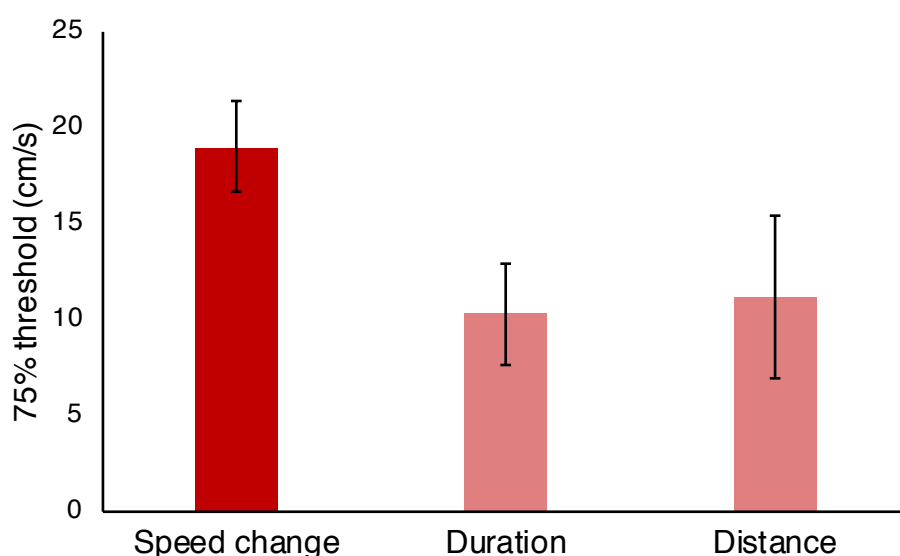

**Figure 3.** 75% thresholds for the *Speed change* discrimination condition ( $n = 11$ ) and the *Duration* and *Distance* speed discrimination conditions, both  $n = 7$ . Error bars are 95% confidence intervals.

358

### 359 *Cue usage in catch trials*

360 Our catch trial analysis showed that participants used a variety of strategies to complete the  
361 task (Figure 4). We categorised the catch trial results into 3 groups based on binomial  
362 proportion confidence intervals:

- 363 (I) 0-30% catch interval picked – we reject the null hypothesis that participants used  
364 only speed. Participant was using duration as a cue.
- 365 (II) 70-100% catch interval picked – we reject the null hypothesis that participants  
366 used only speed. Participant was using distance as a cue.
- 367 (III) 31-69% catch interval picked – we do not reject the null hypothesis. Participant  
368 was primarily using speed to make their judgements in the catch trials.

369 From the pattern of data in Figure 4A, it appeared that in the *Duration* speed  
370 discrimination condition, 1 participant used the shorter duration information, 3  
371 participants used speed information and 3 participants used the longer distance  
372 information to complete the task. In the *Distance* speed discrimination condition, 2  
373 participants used the shorter duration, 2 participants used speed information and 3  
374 participants used the longer distance information to complete the task (see Figure 4B).

375 Our data suggest that different participants used different cues to complete speed  
376 discrimination tasks.

377

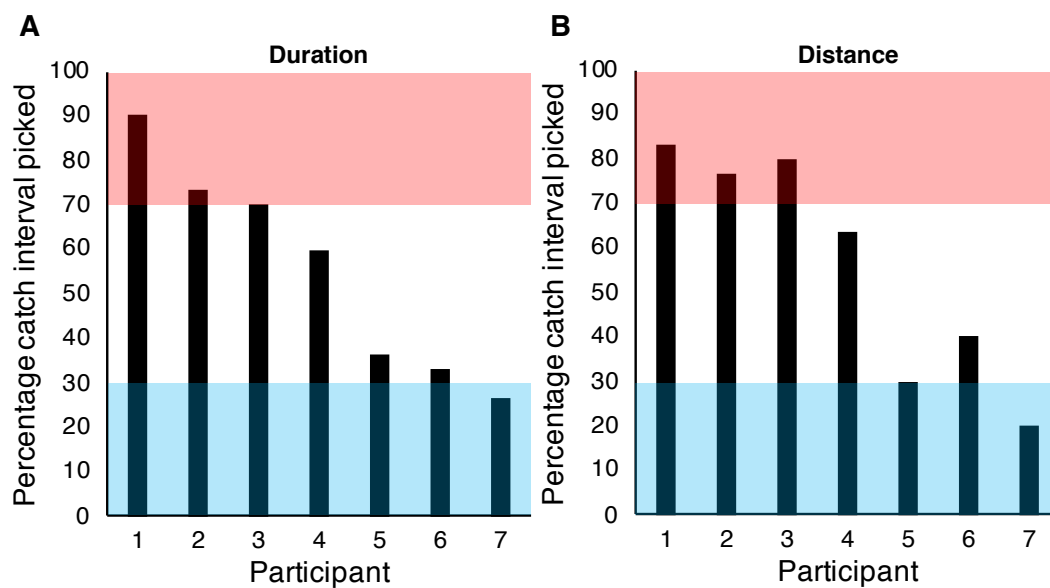

**Figure 4.** The percentage of occasions the catch interval was picked over the standard interval in the catch trials for (A), the *Duration* speed discrimination condition and (B), the *Distance* speed discrimination condition. Participants whose data lie in the pink region used distance cues. Within the blue region, participants used duration information. Data in the white region suggest participants used speed.

378

#### 379 *Individual participant data*

380 Given that some individual participants appear to use cues other than speed in the catch trials,  
381 we might expect that individual participants may perform better in the main experiment  
382 condition where they could use the cue they favoured in the catch trials. For example, we  
383 would expect that Participant 1 in Figure 4, who appeared to use distance information to  
384 make their catch trial judgements, would have improved performance in the *Distance*  
385 condition of the main experiment, because they could use the cue their favoured cue from the  
386 catch trials. In the *Duration* condition of the main experiment, we would expect worse  
387 performance from Participant 1, because there was no distance information available for them  
388 to use.

389

390 There were marked individual differences in performance, as has been found previously in  
391 experiments involving speed discrimination that have used naïve observers (Manning,  
392 Thomas, & Braddick, 2018). However, individual participants did not show a pattern of  
393 thresholds in the main experiment that would be predicted from their behaviour during the  
394 catch trials. Figure 5 illustrates that there was very little difference in threshold between the  
395 two speed discrimination conditions in the main experiment, for all participants.

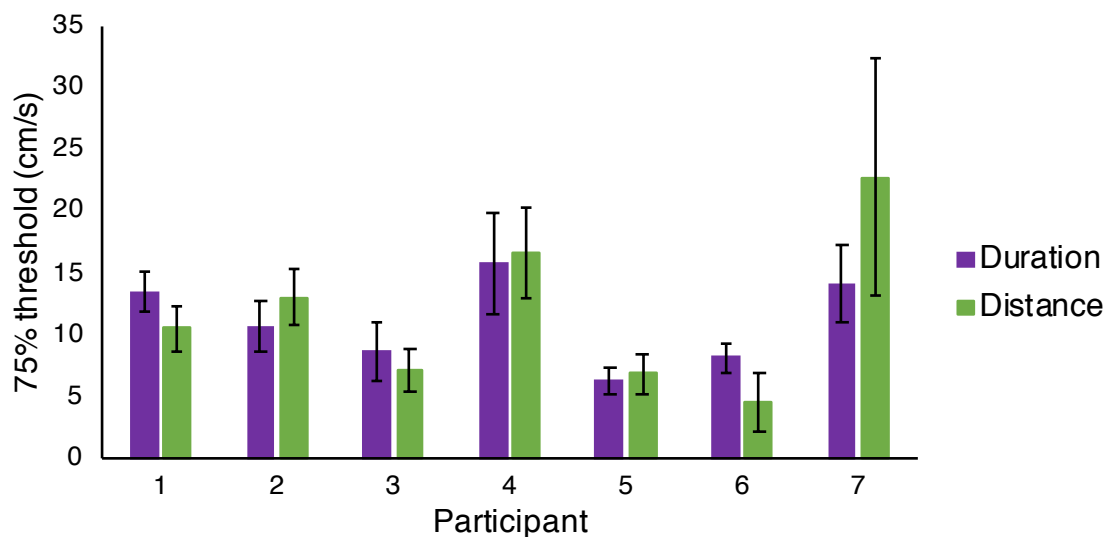

**Figure 5.** Individual 75% thresholds for each participant in the two speed discrimination conditions (*Duration* and *Distance*,  $n = 7$ ). Error bars are standard error of the mean.

396

397 *Do participants use the same cues in the catch and main experiment trials?*

398 Notice that individual participants were consistent in their choice of catch trial cue usage  
399 between the two catch conditions (figure 4). A significant strong correlation of percentage  
400 catch interval picked per participant was found between the two catch conditions ( $r = 0.963$ ,  $n$   
401  $= 7$ ,  $p < 0.001$ ). This suggests participants may have been using cues to perform the task in

402 the catch trials that would not be helpful if used in the main experimental trials. For example,  
403 3 participants appeared to use distance information in the catch trials that were included as  
404 part of the *Duration* speed discrimination condition (see Figure 4A). In this *Duration*  
405 condition, speed and duration cues were available but the distance travelled was fixed. This  
406 means those participants used distance information in the catch trials despite it being  
407 impossible to successfully use distance to make judgements in the main experiment trials of  
408 this condition. As the catch trials were interleaved with the main experimental trials, this  
409 suggests that participants may have been changing between using different cues from one  
410 trial to the next when completing the speed discrimination task.

411

## Discussion

412 The aims of this work were to first determine if speed change discrimination for looming  
413 stimuli is a more difficult task than speed discrimination, and second, to investigate if  
414 participants use distance or duration information, instead of speed information, when it is  
415 available in speed discrimination tasks. If so, this might explain the apparent difficulty of  
416 speed change discrimination judgements. To do this we measured discrimination thresholds  
417 for the two different tasks and included manipulations of the speed discrimination stimuli in  
418 the form of ‘catch trials’, which were designed to reveal the use of distance, duration, or  
419 speed information.

420

421 We found speed change discrimination to be significantly more difficult than speed  
422 discrimination for looming stimuli. This result is in agreement with the previous literature  
423 that has studied at speed change discrimination for 2D motion and other varieties of 3D  
424 motion (Lee et al., 2019; Monen & Brenner, 1994; Snowden & Braddick, 1991). The  
425 majority of our individual participants had 75% thresholds below 20 cm/s in the speed  
426 discrimination conditions (*Duration* and *Distance*, see Figure 5).

427

428 In experiments from other labs using a different type of speed change discrimination task,  
429 where a participant determines whether a stimulus has increased or decreased in speed, the  
430 distinction between speed change and speed discrimination thresholds is slightly less clear.  
431 Thresholds have been reported to be roughly 3 times higher when two speeds are presented  
432 consecutively than when there was a period of 1 second between the two speeds, but only  
433 when only when the duration of motion was short (Mateeff et al., 2000). In another study



434 thresholds as low as 12% have been found for this type of experiment (Hick, 1950).  
435 However, unlike in the two-interval forced choice speed change discrimination task used in  
436 our study, Hick's (1950) experimental setup left it clear when a speed change had occurred,  
437 which could have made their task easier and explain their lower thresholds.

438

439 Our manipulations of the catch trials in the speed discrimination task suggested that  
440 participants were not exclusively using speed to complete the task. We found some  
441 participants who appeared to use speed, some duration, and some distance in the catch trials,  
442 and the cue use correlated between the catch trials in the *Duration* and *Distance* conditions.  
443 This means in some cases participants would have used catch trial strategies that they could  
444 not have used successfully for other trials in the main experiment. For example, in Figure 4,  
445 participant 1 appears to often be using the distance cue to make their judgements in the catch  
446 trials in both the *Duration* condition (Figure 4A) and the *Distance* condition (Figure 4B).  
447 However, participant 1 would not have been able to successfully use distance to perform the  
448 speed discrimination task in the main experiment trials of the *Duration* condition: because the  
449 distance cue was not informative. As participant 1 was able to perform this task well (see  
450 Figure 5), we can infer that participants may have been able to use multiple cues to complete  
451 the speed discrimination task, and, as the catch trials were interleaved amongst the other  
452 experimental trials, that participants could have been switching between using different cues  
453 from trial to trial. It is also possible that participants may have used a combination of  
454 differently-weighted cues to make their judgements in each trial, but our design was not  
455 aimed at testing this hypothesis. As such, we cannot address this possibility here.

456

457 The finding that participants may have used cues other than speed to complete the speed  
458 discrimination task is supported by other studies that have shown that participants may not  
459 use speed information in isolation to discriminate speed (Mandriota, Mintz, & Notterman,  
460 1962; Smith & Edgar, 1991). Mandriota et al. (1962) found that adding distance and duration  
461 cues improved speed discrimination performance, whilst Smith and Edgar (1991) reported  
462 that discrimination of speed and temporal frequency were inseparable when using drifting  
463 grating stimuli, suggesting speed may not be used in isolation.

464

465 On the other hand, our catch trial findings conflict with research suggesting participants use  
466 speed in speed discrimination tasks with both 2D and 3D motion (Harris & Watamaniuk,  
467 1996; Lappin, Bell, Harm, & Kottas, 1975; McKee, 1981; McKee et al., 1986; Orban et al.,  
468 1984; Pasternak, 1987). However, of these studies, only Lappin et al. (1975) included more  
469 than 3 human participants in their study, although Pasternak (1987) also had 9 cats as  
470 subjects. In our study all participants were fully naïve and inexperienced observers. Three of  
471 these previous studies had at least one author as a participant who would have been aware of  
472 the aims of the experiment (Harris & Watamaniuk, 1996; McKee et al., 1986; Pasternak,  
473 1987). It is possible that if a larger number of naïve participants had been used in these  
474 experiments, a greater range of cue usage in speed discrimination tasks may have been  
475 demonstrated.

476

477 If participants do not always use speed in speed discrimination tasks, as suggested here, this  
478 supports the idea that speed change discrimination may be more difficult than speed  
479 discrimination because participants cannot use distance or duration cues in the latter task.  
480 However, there are other possible explanations for why speed change discrimination is a

481 difficult task. For example, it is possible that participants may combine or integrate speed  
482 information over space or time in such a way that it makes speed change discrimination tasks  
483 where two speeds are presented consecutively more difficult. This would be an interesting  
484 avenue for future research.

485

## Acknowledgements

486 This work was supported by the Biotechnology and Biological Sciences Research Council  
487 (BBSRC; <https://bbsrc.ukri.org/>) [grant number BB/M010996/1 to ARIL, BB/N018516/1 to  
488 JMA and BB/M001660/1 to JMH]. The funders had no role in study design, data collection  
489 and analysis, decision to publish, or preparation of the manuscript.

490

491

## References

492 Beverley, K. I., & Regan, D. (1979). Seperable aftereffects of changing-size and motion-in-  
493 depth: different neural mechanisms? *Vision Research*, *19*, 727–723.

494 [https://doi.org/https://doi.org/10.1016/0042-6989\(79\)90251-7](https://doi.org/https://doi.org/10.1016/0042-6989(79)90251-7)

495 Brainard, D. H. (1997). The Psychophysics Toolbox. *Spatial Vision*, *10*(4), 433–436.

496 <https://doi.org/10.1163/156856897X00357>

497 Brooks, K. R. (2002). Interocular velocity difference contributes to stereomotion speed  
498 perception. *Journal of Vision*, *2*(3), 218–231. <https://doi.org/10.1167/2.3.2>

499 Brooks, K. R., & Mather, G. (2000). Perceived speed of motion in depth is reduced in the  
500 periphery. *Vision Research*, *40*(25), 3507–3516. <https://doi.org/10.1016/S0042->

501 [6989\(00\)00095-X](https://doi.org/10.1016/S0042-6989(00)00095-X)

502 Brooks, K. R., & Stone, L. S. (2004). Stereomotion speed perception: Contributions from  
503 both changing disparity and interocular velocity difference over a range of relative  
504 disparities. *Journal of Vision*, *4*(12), 1061–1079. <https://doi.org/10.1167/4.12.6>

505 Brooks, K. R., & Stone, L. S. (2006). Stereomotion suppression and the perception of speed:  
506 accuracy and precision as a function of 3D trajectory. *Journal of Vision*, *6*(11), 1214–

507 [1223. https://doi.org/10.1167/6.11.6](https://doi.org/10.1167/6.11.6)

- 508 de Bruyn, B., & Orban, G. A. (1988). Human velocity and direction discrimination measured  
509 with random dot patterns. *Vision Research*, 28(12), 1323–1335.  
510 [https://doi.org/10.1016/0042-6989\(88\)90064-8](https://doi.org/10.1016/0042-6989(88)90064-8)
- 511 Harris, J. M., & Watamaniuk, S. N. J. (1995). Speed discrimination of motion-in-depth using  
512 binocular cues. *Vision Research*, 35(7), 885–896. [https://doi.org/10.1016/0042-](https://doi.org/10.1016/0042-6989(94)00194-Q)  
513 [6989\(94\)00194-Q](https://doi.org/10.1016/0042-6989(94)00194-Q)
- 514 Harris, J. M., & Watamaniuk, S. N. J. (1996). Poor speed discrimination suggests that there is  
515 no specialized speed mechanism for cyclopean motion. *Vision Research*, 36(14), 2149–  
516 2157. [https://doi.org/10.1016/0042-6989\(95\)00278-2](https://doi.org/10.1016/0042-6989(95)00278-2)
- 517 Heidenreich, S. M., & Turano, K. A. (1996). Speed discrimination under stabilized and  
518 normal viewing conditions. *Vision Research*, 36(12), 1819–1825.  
519 [https://doi.org/10.1016/0042-6989\(95\)00270-7](https://doi.org/10.1016/0042-6989(95)00270-7)
- 520 Hick, W. E. (1950). The threshold for sudden changes in the velocity of a seen object.  
521 *Quarterly Journal of Experimental Psychology*, 2(September), 33–41.  
522 <https://doi.org/10.1080/17470215008416572>
- 523 Kleiner, M., Brainard, D. H., & Pelli, D. (2007). What’s new in Psychtoolbox-3? *Perception*,  
524 36(ECVP Abstract Supplement). Retrieved from <http://psychtoolbox.org/credits/>
- 525 Lappin, J. S., Bell, H. H., Harm, O. J., & Kottas, B. (1975). On the relation between time and  
526 space in the visual discrimination of velocity. *Journal of Experimental Psychology*.  
527 *Human Perception and Performance*, 1(4), 383–394. [https://doi.org/10.1037/0096-](https://doi.org/10.1037/0096-1523.1.4.383)  
528 [1523.1.4.383](https://doi.org/10.1037/0096-1523.1.4.383)
- 529 Lee, A. R. I., Ales, J. M., & Harris, J. M. (2019). Speed change discrimination for motion in  
530 depth with constant world and retinal speeds. *PLoS ONE*, 14(4), e0214766.

- 531 <https://doi.org/10.1371/journal.pone.0214766>
- 532 Mandriota, F. J., Mintz, D. E., & Notterman, J. M. (1962). Visual Velocity Discrimination:  
533 Effects of Spatial and Temporal Cues. *Science*, *138*(3538), 437–438.
- 534 Manning, C., Thomas, R. T., & Braddick, O. J. (2018). Can speed be judged independent of  
535 direction? *Journal of Vision*, *18*(6), 1–16. <https://doi.org/10.1167/18.6.15>
- 536 Mateeff, S., Dimitrov, G., Genova, B., Likova, L., Stefanova, M., & Hohnsbein, J. (2000).  
537 The discrimination of abrupt changes in speed and direction of visual motion. *Vision*  
538 *Research*, *40*(4), 409–415. [https://doi.org/10.1016/S0042-6989\(99\)00185-6](https://doi.org/10.1016/S0042-6989(99)00185-6)
- 539 McKee, S. P. (1981). A local mechanism for differential velocity detection. *Vision Research*,  
540 *21*(4), 491–500. [https://doi.org/10.1016/0042-6989\(81\)90095-X](https://doi.org/10.1016/0042-6989(81)90095-X)
- 541 McKee, S. P., Silverman, G. H., & Nakayama, K. (1986). Precise velocity discrimination  
542 despite random variations in temporal frequency and contrast. *Vision Research*, *26*(4),  
543 609–619.
- 544 McKee, S. P., & Watamaniuk, S. N. J. (1994). The psychophysics of motion perception. In  
545 A. T. Smith & R. J. Snowden (Eds.), *Visual Detection of Motion* (pp. 85–114). London:  
546 Academic Press.
- 547 McKee, S. P., & Welch, L. (1985). Sequential recruitment in the discrimination of velocity.  
548 *Journal of the Optical Society of America A*, *2*(2), 243–251.  
549 <https://doi.org/10.1364/JOSAA.2.000243>
- 550 Monen, J., & Brenner, E. (1994). Detecting changes in one's own velocity from the optic  
551 flow. *Perception*, *23*(6), 681–690. <https://doi.org/10.1068/p230681>
- 552 Orban, G. A., de Wolf, J., & Maes, H. (1984). Factors influencing velocity coding in the

- 553 human visual system. *Vision Research*, 24(1), 33–39. <https://doi.org/10.1016/0042->  
554 6989(84)90141-X
- 555 Pasternak, T. (1987). Discrimination of differences in speed and flicker rate depends on  
556 directionally selective mechanisms. *Vision Research*, 27(11), 1881–1890.  
557 [https://doi.org/10.1016/0042-6989\(87\)90054-X](https://doi.org/10.1016/0042-6989(87)90054-X)
- 558 Pelli, D. G. (1997). The VideoToolbox software for visual psychophysics: transforming  
559 numbers into movie. *Spatial Vision*, 10(4), 437–442.  
560 <https://doi.org/10.1163/156856897X00366>
- 561 Prins, N., & Kingdom, F. A. A. (2009). Palamedes: Matlab routines for analyzing  
562 psychophysical data. Retrieved from <http://www.palamedestoolbox.org/>
- 563 Regan, D., & Beverley, K. I. (1978). Illusory motion in depth: Aftereffect of adaptation to  
564 changing size. *Vision Research*, 18, 209–212. <https://doi.org/10.1016/0042->  
565 6989(78)90188-8
- 566 Sekuler, A. B. (1992). Simple-pooling of unidirectional motion predicts speed discrimination  
567 for looming stimuli. *Vision Research*, 32(12), 2277–2288. <https://doi.org/10.1016/0042->  
568 6989(92)90091-V
- 569 Smith, A. T., & Edgar, G. K. (1991). The separability of temporal frequency and velocity.  
570 *Vision Research*, 31(2), 321–326. [https://doi.org/10.1016/0042-6989\(91\)90121-K](https://doi.org/10.1016/0042-6989(91)90121-K)
- 571 Snowden, R. J., & Braddick, O. J. (1991). The temporal integration and resolution of velocity  
572 signals. *Vision Research*, 31(5), 907–914. [https://doi.org/10.1016/0042-6989\(91\)90156-](https://doi.org/10.1016/0042-6989(91)90156-)  
573 Y
- 574 Wardle, S., & Alais, D. (2013). Evidence for speed sensitivity to motion in depth from

575 binocular cues. *Journal of Vision*, 13(2013), 1–16.

576 <https://doi.org/10.1167/13.1.17.Introduction>

577
